# Supplementary material
Source: Springer Nature journal article supplement (https://www.springermedizin.de/resource/supplementary/12888_2012_1186_MOESM1_ESM.pdf/9479418)
Supplement: MOESM1 [file 9479418]

Major trauma patients admitted to the Emergency Department during the study period  $n=524$

Excluded from prospective cohort

- Patients died <30 days  $n=162$
- Patients aged <16 years  $n=30$

Included in the prospective cohort study  $n=332$

Lost to follow-up  $n=106$

- Untraceable (97%)
- Unwillingness to participate (2%)
- Insufficient knowledge of Dutch or English language (1%)

One year follow-up measurements  $n=226$

Lost to follow-up  $n=109$

Two year follow-up measurements  $n=117$
